# Supplementary material for: Tryptophan Intake and Tryptophan Losses in Hemodialysis Patients: A Balance Study
Source: PubMed Central journal article supplement (PMC6950375; doi:10.3390/nu11122851), 2019-11-21
Supplement: nutrients-11-02851-s001.pdf [file nutrients-11-02851-s001.pdf]

## Supplementary data

**Table S1.** Baseline characteristics amongst patients with and without dietary diaries available.

| Baseline characteristics           | Whole cohort<br>(n=40) | Patients with<br>dietary diary<br>(n=26) | Patients without<br>dietary diary<br>(n=14) | P for difference |
|------------------------------------|------------------------|------------------------------------------|---------------------------------------------|------------------|
| <b>Demographics</b>                |                        |                                          |                                             |                  |
| Age, years                         | 66 ± 15                | 64 ± 15                                  | 69 ± 17                                     | 0.30             |
| Gender, n male (%)                 | 27 (68)                | 15 (58)                                  | 12 (86)                                     | 0.07             |
| Race, n Caucasian (%)              | 37 (93)                | 26 (100)                                 | 11 (79)                                     | 0.04             |
| <b>Dialysis-related</b>            |                        |                                          |                                             |                  |
| Dialysis sessions, n (%)           |                        |                                          |                                             |                  |
| 2 sessions per week                | 3 (8)                  | 1 (4)                                    | 2 (14)                                      | 0.28             |
| 3 sessions per week                | 37 (93)                | 25 (96)                                  | 12 (86)                                     |                  |
| Hours per dialysis, n (%)          |                        |                                          |                                             |                  |
| 3 to 3.5 hours                     | 3 (8)                  | 3 (11)                                   | 0 (0)                                       | 0.19             |
| 4 hours                            | 32 (80)                | 21 (81)                                  | 11 (79)                                     | 0.87             |
| 4.5 to 5 hours                     | 5 (13)                 | 2 (8)                                    | 3 (2)                                       | 0.21             |
| Residual diuresis, n (%)           | 27 (68)                | 19 (73)                                  | 8 (57)                                      | 0.48             |
| Urinary volume, L                  | 0.97 ± 0.66            | 0.89 ± 0.61                              | 1.15 ± 0.79                                 | 0.36             |
| Dialysis vintage, months           | 17 [11-48]             | 19 [8-53]                                | 16 [13-47]                                  | 0.94             |
| Ultrafiltration volume, ml         | 1876 ± 903             | 1793 ± 894                               | 2040 ± 936                                  | 0.45             |
| Equilibrated Kt/V per dialysis     | 1.27 ± 0.45            | 1.29 ± 0.53                              | 1.23 ± 0.26                                 | 0.71             |
| Protein catabolic ratio, g/kg/24 h | 1.08 ± 0.31            | 1.08 ± 0.34                              | 1.08 ± 0.24                                 | 0.97             |
| <b>Body composition</b>            |                        |                                          |                                             |                  |
| Target body weight, kg             | 80.8 ± 18.5            | 81.6 ± 18.9                              | 79.4 ± 18.5                                 | 0.76             |
| Interdialytic weight gain, kg      | 1.12 ± 1.14            | 1.00 ± 1.08                              | 1.33 ± 1.26                                 | 0.41             |
| Height, m                          | 1.76 ± 0.10            | 1.76 ± 0.10                              | 1.76 ± 0.10                                 | 0.92             |
| BMI, kg/m <sup>2</sup>             | 25.2 ± 4.5             | 25.2 ± 4.5                               | 25.2 ± 4.7                                  | 0.99             |
| BSA, m <sup>2</sup>                | 1.95 ± 0.24            | 1.95 ± 0.26                              | 1.94 ± 0.21                                 | 0.87             |
| <b>Pre-existing disease</b>        |                        |                                          |                                             |                  |
| Hypertension, n (%)                | 23 (58)                | 15 (58)                                  | 8 (57)                                      | 0.99             |
| Diabetes, n (%)                    | 9 (23)                 | 7 (27)                                   | 2 (14)                                      | 0.36             |
| Cardiovascular disease, n (%)      | 12 (30)                | 6 (23)                                   | 6 (43)                                      | 0.19             |

P for difference was assessed using independent sample *t*-test, Mann-Whitney *U* test and Chi-Squared test.

Abbreviations: BMI, body mass index; BSA, body surface area.
